# Supplementary material for: Feasibility, safety, and resource utilisation of active mobilisation of patients on extracorporeal life support: a prospective observational study
Source: PubMed Central journal article supplement (PMC7708587; doi:10.1186/s13613-020-00776-3), 2020-12-01
Supplement: 13613_2020_776_MOESM1_ESM.pdf [file 13613_2020_776_MOESM1_ESM.pdf]

**Table 3:** Duration of ECLS treatments according to type of ECLS and ICU-mortality

| Primary type of ECLS      | Death in ICU | Discharge from ICU | All<br>n=115 | p-value |
|---------------------------|--------------|--------------------|--------------|---------|
| <b>Days on ECLS</b>       |              |                    |              |         |
| Respiratory ECLS          | 10.0 (5-19)  | 9.0 (6-11)         | 9 (5-15)     | 0.70    |
| vv-ECMO                   | 7.5 (2-14)   | 8.0 (6-11)         | 7.5 (4-11)   | 0.80    |
| vv-ECCO <sub>2</sub> R    | 14.5 (8-23)  | 8.5 (3-12)         | 9.5 (4-21)   | 0.39    |
| av-ECCO <sub>2</sub> R    | 17.0 (10-20) | 9.0 (4-17)         | 13 (5-23)    | 0.31    |
| Non-eCPR circulatory ECLS | 4.0 (1-9)    | 10.0 (6-14)        | 6.5 (2-12)   | 0.006   |
| va-ECMO (non-eCPR)        | 4.0 (1-9)    | 10 (6-16)          | 6.0 (2-10)   | 0.001   |
| RVAD                      | 20.0 (14-26) | 7.5 (3-12)         | 13.0 (5-23)  | 0.30    |
| eCPR (va-ECMO)            | 2 (1-5)      | 7.0 (4-9)          | 3.5 (1-7)    | 0.10    |
| All ECLS                  | 5.0 (1-12)   | 9.0 (6-12)         | 7 (3-12)     | 0.016   |

Data is presented as median (25th and 75th percentile) for continuous variables. ECLS = Extracorporeal Life Support; vv-ECMO = veno-venous Extracorporeal Membrane Oxygenation; vv-ECCO<sub>2</sub>R = veno-venous Extracorporeal Carbon Dioxide Removal; av-ECCO<sub>2</sub>R = arterio-venous Extracorporeal Carbon Dioxide Removal; va-ECMO = veno-arterial Extracorporeal Membrane Oxygenation; eCPR = extracorporeal Cardiopulmonary Resuscitation; RVAD = Right Ventricular Assist Device.
