# Supplementary material for: Feasibility, safety, and resource utilisation of active mobilisation of patients on extracorporeal life support: a prospective observational study
Source: PubMed Central journal article supplement (PMC7708587; doi:10.1186/s13613-020-00776-3), 2020-12-01
Supplement: 13613_2020_776_MOESM2_ESM.pdf [file 13613_2020_776_MOESM2_ESM.pdf]

**Table 1:** Respiratory, haemodynamic, and renal variables within 6 hours before initiation of ECLS according to level of mobilisation.

| Variable                                                                                                | Mob<br>n=43 (37.4%) | Non-Mob<br>n=72 (62.6%) | All patients<br>n=115 | p-value |
|---------------------------------------------------------------------------------------------------------|---------------------|-------------------------|-----------------------|---------|
| <b>Respiratory, haemodynamic, and renal variables before initiation of ECLS – median (IQR) or n (%)</b> |                     |                         |                       |         |
| Pre-PaO <sub>2</sub> /FiO <sub>2</sub> (mmHg)                                                           | 146 (98-242)        | 136.5 (78-204)          | 142 (80-235)          | 0.33    |
| Pre-PaCO <sub>2</sub> in respiratory ECLS                                                               | 58.4 (38.7-82)      | 55.4 (36.6-72.5)        | 55.4 (37-80)          | 0.63    |
| Pre-pH in respiratory ECLS                                                                              | 7.3 (7.2-7.4)       | 7.3 (7.1-7.3)           | 7.3 (7.1-7.4)         | 0.09    |
| Lactate max <6h pre-ECLS (mmol/l)                                                                       | 1.3 (0.9-2.0)       | 4.7 (1.5-9.4)           | 2.0 (1.2-6.2)         | < 0.001 |
| Catecholamines in 24h pre-ECLS n                                                                        | 22 (28.9)           | 54 (71.1)               | 76 (66.1)             | < 0.001 |
| Adrenalin max <6h pre-ECLS                                                                              | 0.1 (0.008-0.5)     | 0.4 (0.01-9.3)          | 0.2 (0.1-1.4)         | 0.31    |
| Noradrenalin max <6h pre-ECLS                                                                           | 0.5 (0.2-0.6)       | 0.7 (0.3-2.0)           | 0.5 (0.2-1.4)         | 0.06    |
| Dobutamine max <6h pre-ECLS                                                                             | 4 (3.6-4.8)         | 5.2(3.9-8.2)            | 4.2(3.7-7.5)          | 0.22    |
| On RRT Pre-ECLS n (%)                                                                                   | 4 (57.1)            | 3 (42.9)                | 7 (6.1)               | 0.42    |
| Without IMV Pre-ECLS n (%)                                                                              | 9 (20.9)            | 3 (4.2)                 | 12 (10.4)             | 0.09    |
| Mean days on IMV Pre-ECLS                                                                               | 3.7 (0-59)          | 1.7 (0-34)              | 2.5 (0-59)            | 0.29    |

Data is presented as n (%) for categorical variables and median (25th and 75th percentile) for continuous variables. Mob = at least one active mobilisation episode with IMS  $\geq$  3; Non-Mob = never mobilised with IMS  $\geq$  3; eCPR = extracorporeal Cardiopulmonary Resuscitation; ECLS = Extracorporeal Life Support; va-ECMO = veno-arterial Extracorporeal Membrane Oxygenation; vv-ECMO = veno-venous Extracorporeal Membrane Oxygenation; vv-ECCO<sub>2</sub>R = veno-venous Extracorporeal Carbon Dioxide Removal; av-ECCO<sub>2</sub>R = arterio-venous Extracorporeal Carbon Dioxide Removal; RVAD = Right Ventricular Assist Device; DL = Double Lumen; IQR = Interquartile Range; PaO<sub>2</sub> = Partial Arterial Oxygen Pressure; FiO<sub>2</sub> = Fraction Inspired Oxygen; PaCO<sub>2</sub> = Partial Arterial Carbon Dioxide Pressure; RRT = Renal Replacement Therapy; IMV = Invasive Mechanical Ventilation.
