# Supplementary material for: Feasibility, safety, and resource utilisation of active mobilisation of patients on extracorporeal life support: a prospective observational study
Source: PubMed Central journal article supplement (PMC7708587; doi:10.1186/s13613-020-00776-3), 2020-12-01
Supplement: 13613_2020_776_MOESM3_ESM.pdf [file 13613_2020_776_MOESM3_ESM.pdf]

**Table 2:** Variation of haemodynamic state, oxygenation, and ECLS blood flow over the course of each active mobilisation unit  $IMS \geq 3$ .

| Variable                                      | Pre-Mob       | During Mob    | Post-Mob      | p-value |
|-----------------------------------------------|---------------|---------------|---------------|---------|
| Heart rate (/min)                             | 94 (84-108)   | 107 (92-120)  | 94 (83-108)   | < 0.001 |
| Mean arterial pressure (mmHg)                 | 81 (70-91)    | 71 (60-83)    | 80 (69-91)    | < 0.001 |
| Arterial O <sub>2</sub> saturation (%)        | 96 (93-98)    | 91 (86-95)    | 97 (94-99)    | < 0.001 |
| BF high-flow ECLS (vv-/va-ECMO, RVAD)         | 3.9 (3.2-4.7) | 3.7 (3.1-4.5) | 3.8 (3.1-4.7) | < 0.001 |
| BF mid-flow ECLS (vv-/av-ECCO <sub>2</sub> R) | 1.4 (1.3-1.6) | 1.4 (1.2-1.6) | 1.4 (1.2-1.5) | 0.03    |

Data is presented as median (25th and 75th percentile) for continuous variables. Mob = at least one active mobilisation episode with  $IMS \geq 3$ ; BF = Blood Flow in the extracorporeal circuit; ECLS = Extracorporeal Life Support; va-ECMO = veno-arterial Extracorporeal Membrane Oxygenation; vv-ECMO = veno-venous Extracorporeal Membrane Oxygenation; vv-ECCO<sub>2</sub>R = veno-venous Extracorporeal Carbon Dioxide Removal; av-ECCO<sub>2</sub>R = arterio-venous Extracorporeal Carbon Dioxide Removal; RVAD = Right Ventricular Assist Device.
